# Supplementary material
Source: PubMed Central journal article supplement (PMC8185582)
Supplement: NIHMS1706593-supplement-Supplementary_Material.pdf [file NIHMS1706593-supplement-Supplementary_Material.pdf]

## SUPPLEMENTAL MATERIAL

### **Xanthine Oxidase Drives Hemolysis and Vascular Malfunction in Sickle Cell Disease**

Heidi M. Schmidt<sup>1</sup>, Katherine C. Wood<sup>2</sup>, Sara E. Lewis<sup>3</sup>, Scott A. Hahn<sup>2</sup>, Xena M. Williams<sup>3</sup>, Brenda McMahon<sup>2</sup>, Jeffrey J. Baust<sup>2</sup>, **Shuai Yuan<sup>2</sup>**, Timothy N. Bachman<sup>2</sup>, Yekai Wang<sup>4,5</sup>, Joo-Yeun Oh<sup>6</sup>, Samit Ghosh<sup>2,7</sup>, Solomon F. Ofori-Acquah<sup>2,7,8</sup>, Jeffrey D. Lebensburger<sup>9</sup>, Rakesh P. Patel<sup>6,10</sup>, Jianhai Du<sup>4,5</sup>, Dario A Vitturi<sup>1,2</sup>, Eric E. Kelley<sup>3</sup>, and Adam C. Straub<sup>1,2</sup>

*<sup>1</sup>Department of Pharmacology and Chemical Biology, University of Pittsburgh, Pittsburgh, Pennsylvania; <sup>2</sup>Heart, Lung, Blood and Vascular Medicine Institute, University of Pittsburgh, Pittsburgh, Pennsylvania; <sup>3</sup>Department of Physiology and Pharmacology, Health Sciences Center, West Virginia University, Morgantown, WV; <sup>4</sup>Department of Ophthalmology, West Virginia University, Morgantown, WV; <sup>5</sup>Department of Biochemistry, West Virginia University, Morgantown, WV; <sup>6</sup>Center for Free Radical Biology, University of Alabama at Birmingham, Birmingham, AL; <sup>7</sup>Division of Hematology/Oncology, Department of Medicine, School of Medicine, University of Pittsburgh, Pittsburgh, PA; <sup>8</sup>School of Biomedical and Allied Health Sciences, University of Ghana, Accra, Ghana; <sup>9</sup>Department of Pediatrics, University of Alabama at Birmingham, Birmingham, AL; <sup>10</sup>Department of Pathology, University of Alabama at Birmingham, Birmingham, AL*

## **SUPPLEMENTAL METHODS**

### ***Coumarin Boronic Acid (CBA) Assay***

Oxidant load ( $\text{H}_2\text{O}_2$ ,  $\text{O}=\text{NOO}^-$ , and  $\text{HClO}$ ) was measured using coumarin boronic acid (CBA) as previously published with some modifications.<sup>1</sup> Plasma samples were collected and stored at  $-80^\circ\text{C}$ . To preserve oxidant production in plasma samples, sodium azide (20 mM) was supplemented to inhibit enzyme activity immediately upon thawing the plasma. CBA probe (Cayman, 14051) was prepared in the assay buffer (0.01% BSA in HBSS) and mixed with plasma samples at 0.5 mM final concentration. Kinetic fluorescence measurement was performed at 350/450 nm,  $37^\circ\text{C}$ . The amount of oxidant load was quantified by the production rate of the fluorescent product in the log phase and expressed as fold change.

### ***Pulmonary, Mesenteric, and Thoracodorsal (TDA) Ex-Vivo Two-Pin Wire Myography***

Myography experiments were performed similarly to those previously described by our lab.<sup>2</sup> Briefly, mice were euthanized by heart puncture, following right heart catheterization (see below). Pulmonary, mesenteric, and TDA arteries were rapidly excised, placed in room temperature physiological salt solution (PSS), cleaned of fat, cut into 2 mm rings fitted with two 25  $\mu\text{m}$  wires, and placed on a wire myograph (DMT 620M) filled with PSS containing (in mM): NaCl 119, KCl 4.7,  $\text{MgSO}_4$  1.17,  $\text{KH}_2\text{PO}_4$  1.18, D-glucose 5.5,  $\text{NaHCO}_3$  25, EDTA 0.027,  $\text{CaCl}_2$  2.5, pH 7.4 when bubbled with 95%  $\text{O}_2$  and 5%  $\text{CO}_2$  at  $37^\circ\text{C}$ . Vessels were allowed to rest for 30 minutes in PSS buffer. Vessels were then incrementally stretched to a tension equivalent to 80 mmHg. To constrict the arteries and determine viability, 60 mM potassium (K) in PSS (KPSS) was added for 5 minutes. Vessels were washed (3x) and rested in PSS for 30 minutes. For vessels isolated from mice treated with febuxostat, 10  $\mu\text{M}$  febuxostat was added to the PSS following the washes. For pulmonary arteries, vasoconstriction was induced with increasing doses of the constrictor prostaglandin  $\text{F}_{2\alpha}$  (PGF) ( $10^{-7}$ - $10^{-5}$  M, Tocris #4214) at 4-minute intervals until the vessels reached maximum constriction. For mesenteric and TDA arteries vasoconstriction was induced with increasing doses of the constrictor U46619 ( $10^{-7.5}$ - $10^{-6.5}$  M, Cayman Chemicals) at 4-minute intervals until the vessels reached maximum constriction. Pulmonary, mesenteric, and TDA arteries were then treated with increasing doses of the vasodilator acetylcholine ( $10^{-8}$ - $10^{-5}$  M, Sigma) at 3-minute intervals. Finally, vessels were treated with  $\text{Ca}^{2+}$  free PSS containing 100  $\mu\text{M}$  SNP to determine maximal dilation. Data was collected using Lab Chart Software (AD Instruments) and normalized to the change in maximum constriction or maximum dilation to determine the percent relaxation of vessels.

### ***Closed Chest Right Ventricle (RV) Micro-Catheterization***

Micro-catheterization was performed as previously described.<sup>3, 4</sup> Briefly, mice were anesthetized with an intraperitoneal injection of etomidate/urethane (9/1.1 mg/kg, Butler Schein). Body temperature was regulated with a heating pad and heating lamp. While in the supine position, an incision was made between the sternohyoid and sternomastoid muscles of the right neck. Catheterization of an isolated 20 mm section of the external jugular vein was done using two 6-0 silk sutures by tying a surgical knot at the cranial end

of the external jugular vein and the other looped lightly on the same vein by the heart. A small incision was made in the vein and a 1.2F micro pressure-volume (PV) catheter was inserted beyond the suture by the heart which was then tightened to prevent bleeding. The catheter was further advanced until it passed through the right atrium and into the right ventricle. Pressure measurements were given five minutes to stabilize before beginning recording. The PV catheter was removed and the external jugular was ligated to prevent further bleeding. Pressure waveforms were saved and analyzed using IOX2 Software (EMKA Technologies; Falls Church, VA) and MATLAB (Mathworks, Natick, MA, USA).

### ***Echocardiogram***

Echocardiograms were performed by the University of Pittsburgh Rodent Ultrasonography Core. Mice were anesthetized with 3% isoflurane (maintained with 1.5% isoflurane) and body temperature was maintained with a heating pad. Images of the right and left ventricles were acquired using a Vevo 3100 imaging system and the VisualSonic MX400 (20-46 MHz, 50  $\mu$ m axial resolution) linear array transducer (FUJIFILM VisualSonics, Toronto, Canada). Heart rate was maintained between 400-500 bpm by adjusting the isoflurane concentration between 1-2%. Image acquisition and analysis was done as previously described.<sup>5</sup>

### ***Trichrome Staining***

Trichrome staining was performed as previously described.<sup>6</sup> Tissues were stained using the Masson's Trichrome Kit (Thermo Fisher) in accordance with the manufacturer's guidelines. Sections were imaged using the TissueGnostics Microscope with a 20x objective and stitched using NIS Elements Software (Snake Stich, 8% overlap). Quantification of trichrome positive/fibrotic area was done using FIJI software.

## SUPPLEMENTAL FIGURE LEGENDS

**Supplemental Figure I. Characterization of chimeric SCD mouse model treated with febuxostat.** **A)** Experimental design. **B)** Bone marrow engraftment evaluated by hemoglobin electrophoresis at 0, 3, and 10 weeks post-engraftment. Eighty percent was used as the threshold for adequate engraftment. Values are mean  $\pm$  SEM using a one-way ANOVA with Sidak's multiple comparisons test. \* $P < 0.05$ , \*\* $P < 0.01$ , \*\*\* $P < 0.001$ , and \*\*\*\* $P < 0.0001$ . **C)** LC/MS-MS was used for purine metabolite analysis of hypoxanthine, xanthine, and urate. **D)** Febuxostat treatment decreased body weight of AA mice. Values are mean  $\pm$  SEM using an unpaired Student's *t* test unless otherwise noted. <sup>#</sup>Values are mean  $\pm$  SEM using an unpaired Student's *t* test with Welch's correction. **E)** Spleen weight was normalized to tibia length. Values are mean  $\pm$  SEM using a one-way ANOVA with Sidak's multiple comparisons test. \*\*\*\* $P < 0.0001$ . WT, wild type; febux, febuxostat; HypoX, hypoxanthine; SCD, sickle cell disease.

**Supplemental Figure II. Evaluation of hemolysis in AA and SS mice treated with febuxostat.** **A)** Experimental design. UV-visible spectral deconvolution was used to measure **B)** MetHb and **C)** OxyHb after 10 weeks of treatment. Values are mean  $\pm$  SEM using a one-way ANOVA with Sidak's multiple comparisons test. \* $P < 0.05$ , \*\* $P < 0.01$ . UV-visible spectral deconvolution was used to measure **D)** plasma cell free hemoglobin, a combination of MetHb and OxyHb, and **E)** cell free hemin after 10 weeks of treatment. An ELISA was used to measure plasma **F)** haptoglobin and **G)** hemopexin concentration after 10 weeks of treatment. Values are mean  $\pm$  SEM using an unpaired Student's *t* test. WT, wild type; febux, febuxostat; MetHb, methemoglobin; OxyHb, oxyhemoglobin; ELISA, enzyme linked immunosorbent assay.

**Supplemental Figure III. Ex-vivo wire myography of AA mice treated with febuxostat.** **A)** Ex vivo wire myography was used to assess vasoreactivity of pulmonary, mesenteric, and TDA arteries. **B)** Pulmonary, **C)** mesenteric, and **D)** TDA constriction was measured by normalizing to maximum KCl response. Values are mean  $\pm$  SEM using an unpaired Student's *t* test unless otherwise noted. <sup>#</sup>Values are mean  $\pm$  SEM using an unpaired Student's *t* test with Welch's correction. An acetylcholine dose response was used to measure dilation of **E)** pulmonary (AA  $n=12$ , AA + Febux.  $n=4$ ), **F)** mesenteric (AA  $n=6$ , AA + Febux.  $n=4$ ), and **G)** TDA (AA  $n=6$ , AA + Febux.  $n=4$ ) arteries. Values are mean  $\pm$  SEM using a two-way ANOVA with Sidak's multiple comparisons test. TDA, thoracodorsal; KPSS, potassium physiological salt solution; PSS, physiological salt solution; febux, febuxostat; max, maximum.

**Supplemental Figure IV. XO inhibition did not affect the cardiac fibrosis observed in SS sickle mice.** **A)** Experimental design. **B)** RV weight and **C)** LV + septum weight were normalized to tibia length. **D)** Trichrome staining of RV (top) and LV (bottom) heart sections. Scale bar = 100  $\mu\text{m}$ . Quantification of **E)** RV and **F)** LV trichrome staining using FIJI software. Values are mean  $\pm$  SEM using an unpaired Student's *t* test unless otherwise noted. <sup>#</sup>Values are mean  $\pm$  SEM using a Mann-Whitney test. WT, wild type; febux, febuxostat; RV, right ventricle; LV, left ventricle; XO, xanthine oxidase.

**Supplemental Figure V. Characterization and evaluation of hemolysis in hepatocyte-specific XO KO mice.** **A)** Experimental design. **B)** Bone marrow engraftment evaluated by hemoglobin electrophoresis at 0, 3, and 10 weeks post-engraftment. Eighty percent was used as the threshold for adequate engraftment. **C)** LC/MS-MS was used for purine metabolite analysis of hypoxanthine, xanthine, and urate. **D)** Hepatocyte-specific XO KO did not alter body weight of HXdh<sup>-/-</sup> mice. UV-visible spectral deconvolution was used to measure **E)** plasma MetHb and OxyHb and **F)** cell free hemin 10 weeks post-engraftment. **G)** An ELISA was used to measure plasma hemopexin concentration after 10 weeks of treatment. Values are mean ± SEM using an unpaired **Student's** t test unless otherwise noted. #Values are mean ± SEM using a Mann-Whitney test. \*Values are mean ± SEM using an unpaired **Student's** t test with Welch's correction. XDH, xanthine dehydrogenase; HypoX, hypoxanthine; MetHb, methemoglobin; OxyHb, oxyhemoglobin; XO, xanthine oxidase; KO, knockout; ELISA, enzyme linked immunosorbent assay.

**Supplemental Figure VI. Evaluation of vasoreactivity and cardiac function of HXdh<sup>-/-</sup> mice.** **A)** Experimental design. **B)** Pulmonary, **C)** mesenteric, and **D)** TDA constriction was measured by normalizing to maximum KCl response. Values are mean ± SEM using an unpaired **Student's** t test. An acetylcholine dose response was used to measure dilation of **E)** mesenteric (*Xdh<sup>fl/fl</sup>* n=8, *Xdh<sup>-/-</sup>* n=7), and **F)** TDA (*Xdh<sup>fl/fl</sup>* n=8, *Xdh<sup>-/-</sup>* n=6) arteries. Values are mean ± SEM using a two-way ANOVA with Sidak's multiple comparisons test. **G)** RV weight and **H)** LV + septum weight was normalized to tibia length. Values are mean ± SEM using an unpaired **Student's** t test. XDH, xanthine dehydrogenase; max, maximum; TDA, thoracodorsal; RV, right ventricle; LV, left ventricle.

## SUPPLEMENTAL REFERENCES

1. DeVallance E, Branyan KW, Lemaster KC, Anderson R, Marshall KL, Olfert IM, Smith DM, Kelley EE, Bryner RW, Frisbee JC and Chantler PD. Exercise training prevents the perivascular adipose tissue-induced aortic dysfunction with metabolic syndrome. *Redox Biol.* 2019;26:101285.
2. Rahaman MM, Nguyen AT, Miller MP, Hahn SA, Sparacino-Watkins C, Jobbagy S, Carew NT, Cantu-Medellin N, Wood KC, Baty CJ, Schopfer FJ, Kelley EE, Gladwin MT, Martin E and Straub AC. Cytochrome b5 Reductase 3 Modulates Soluble Guanylate Cyclase Redox State and cGMP Signaling. *Circ Res.* 2017;121:137-148.
3. Potoka KP, Wood KC, Baust JJ, Bueno M, Hahn SA, Vanderpool RR, Bachman T, Mallampalli GM, Osei-Hwedieh DO, Schrott V, Sun B, Bullock GC, Becker-Pelster EM, Wittwer M, Stampfuss J, Mathar I, Stasch JP, Truebel H, Sandner P, Mora AL, Straub AC and Gladwin MT. Nitric Oxide-Independent Soluble Guanylate Cyclase Activation Improves Vascular Function and Cardiac Remodeling in Sickle Cell Disease. *Am J Respir Cell Mol Biol.* 2018;58:636-647.
4. Wood KC, Durgin BG, Schmidt HM, Hahn SA, Baust JJ, Bachman T, Vitturi DA, Ghosh S, Ofori-Acquah SF, Mora AL, Gladwin MT and Straub AC. Smooth muscle cytochrome b5 reductase 3 deficiency accelerates pulmonary hypertension development in sickle cell mice. *Blood Adv.* 2019;3:4104-4116.
5. Rutledge C, Cater G, McMahon B, Guo L, Nouraie SM, Wu Y, Villanueva F and Kaufman BA. Commercial 4-dimensional echocardiography for murine heart volumetric evaluation after myocardial infarction. *Cardiovasc Ultrasound.* 2020;18:9.
6. Durgin BG, Hahn SA, Schmidt HM, Miller MP, Hafeez N, Mathar I, Freitag D, Sandner P and Straub AC. Loss of smooth muscle CYB5R3 amplifies angiotensin II-induced hypertension by increasing sGC heme oxidation. *JCI Insight.* 2019;4.

## Major Resources Table

In order to allow validation and replication of experiments, all essential research materials listed in the Methods should be included in the Major Resources Table below. Authors are encouraged to use public repositories for protocols, data, code, and other materials and provide persistent identifiers and/or links to repositories when available. Authors may add or delete rows as needed.

### Animals (in vivo studies)

| Species  | Vendor or Source     | Background Strain | Sex | Persistent ID / URL |
|----------|----------------------|-------------------|-----|---------------------|
| C57BL/6J | Jackson Laboratories | N/A               | M   | N/A                 |

### Genetically Modified Animals

| Species                                               | Vendor or Source                 | Background Strain | Other Information | Persistent ID / URL |
|-------------------------------------------------------|----------------------------------|-------------------|-------------------|---------------------|
| Xdh <sup>fl/fl</sup> Alb-1 <sup>Cre/Wt or Wt/Wt</sup> | Bred at University of Pittsburgh | C57Bl/6J          | N/A               | N/A                 |
| Townes AA and SS                                      | Bred at University of Pittsburgh | C57Bl/6J and 129S | N/A               | N/A                 |

**Antibodies- Not applicable**

**DNA/cDNA Clones- Not applicable**

**Cultured Cells- Not applicable**

**Data & Code Availability- Not applicable**

**Other- Not applicable**

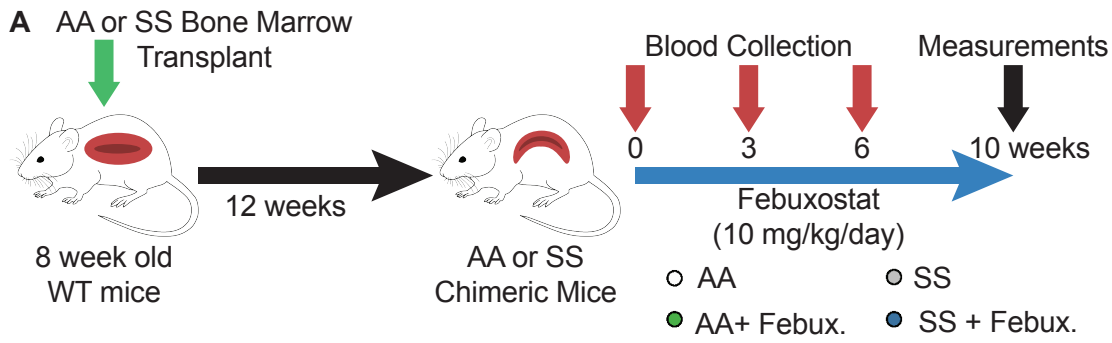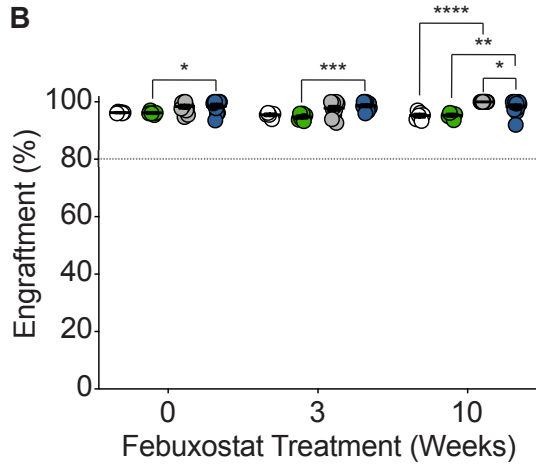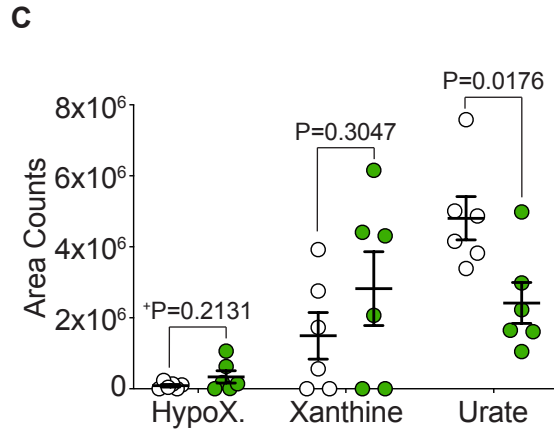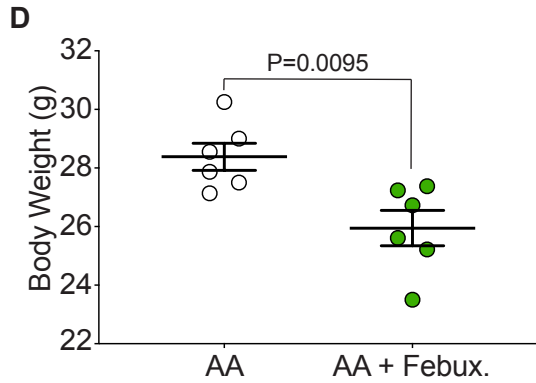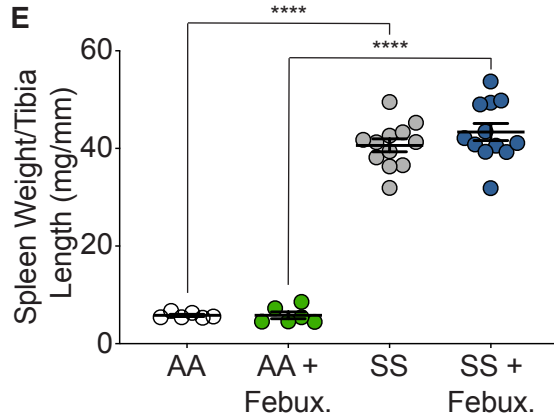



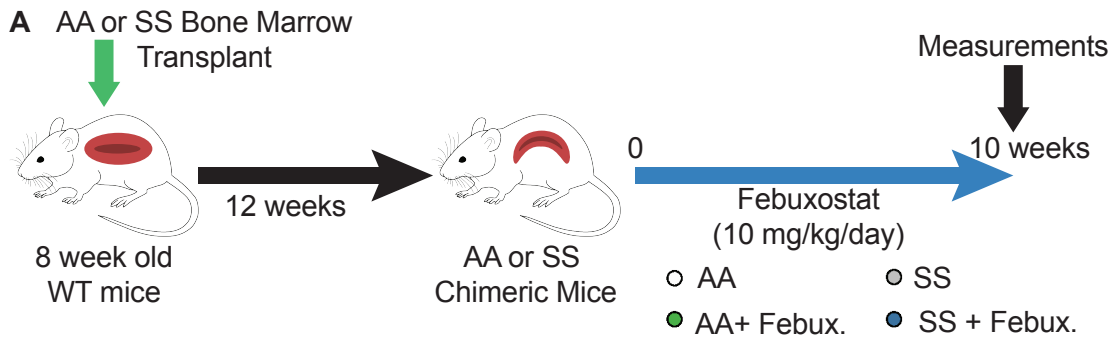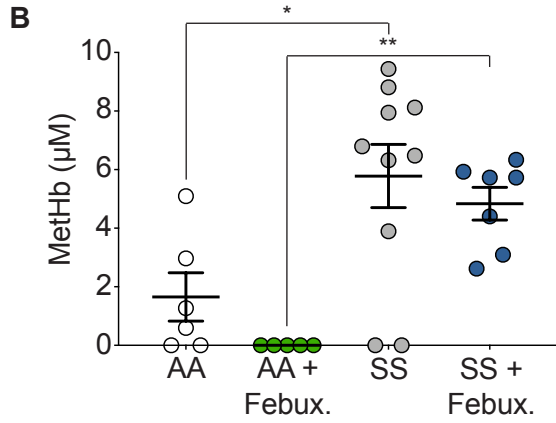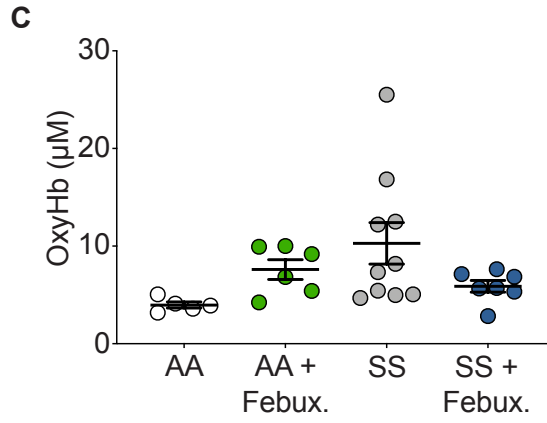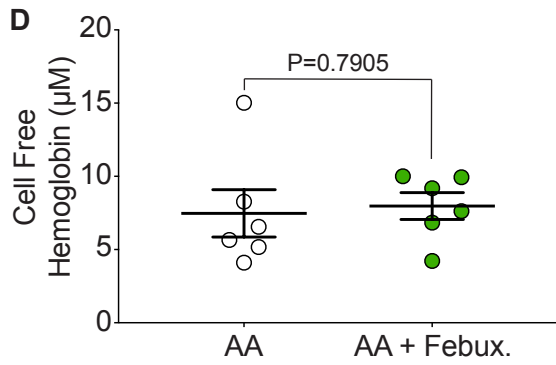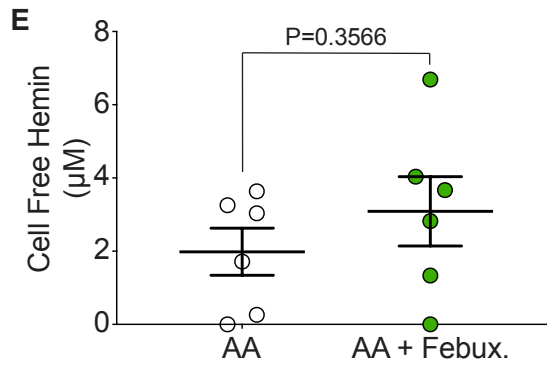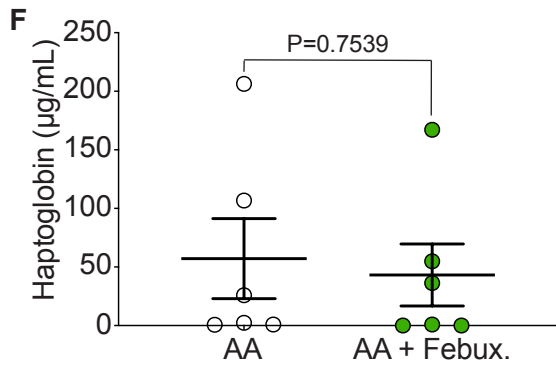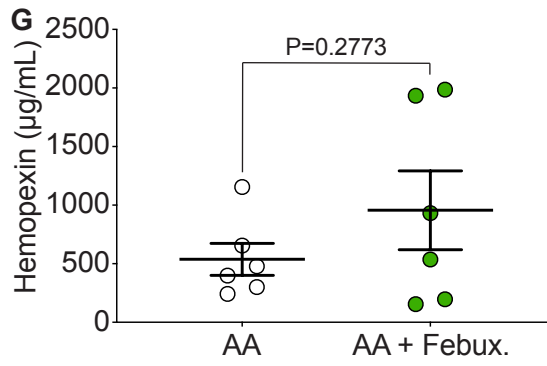

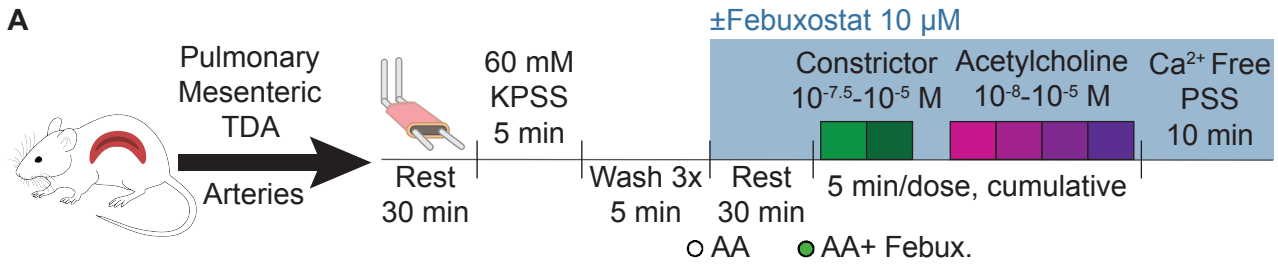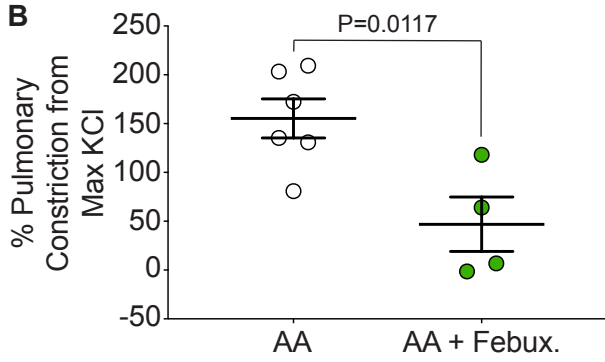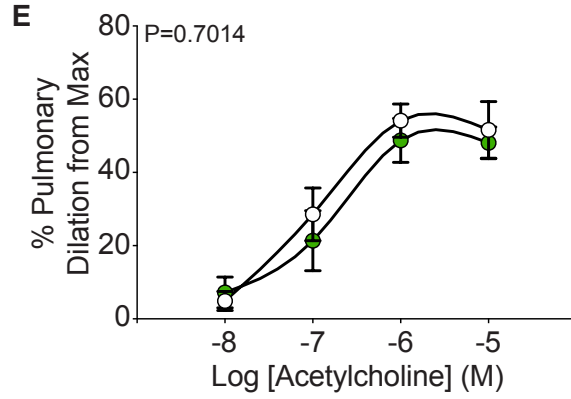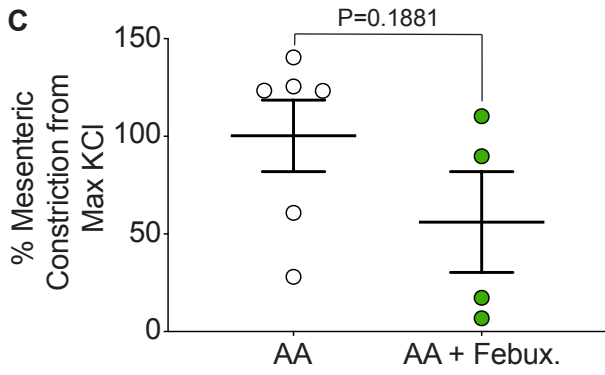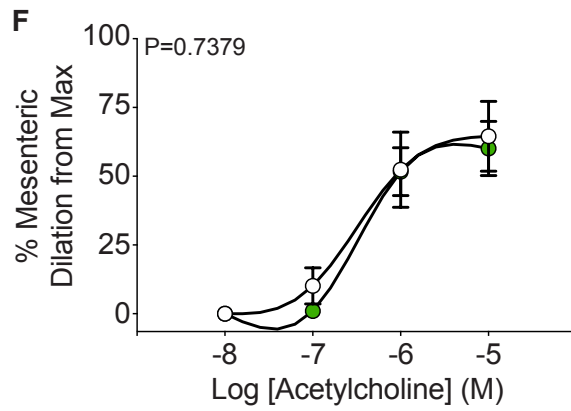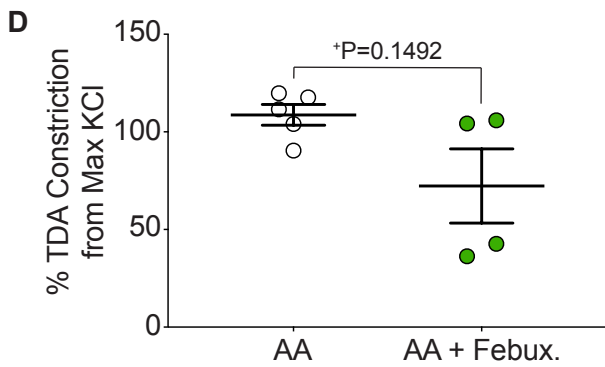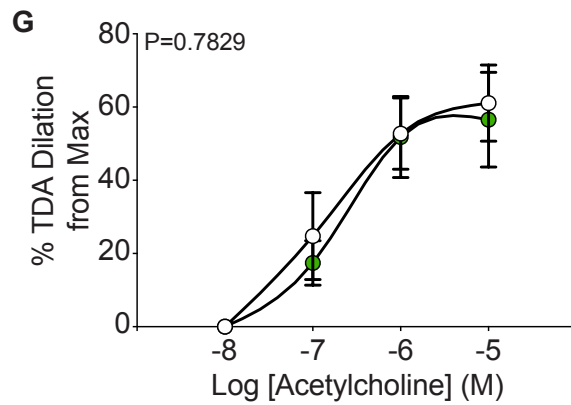

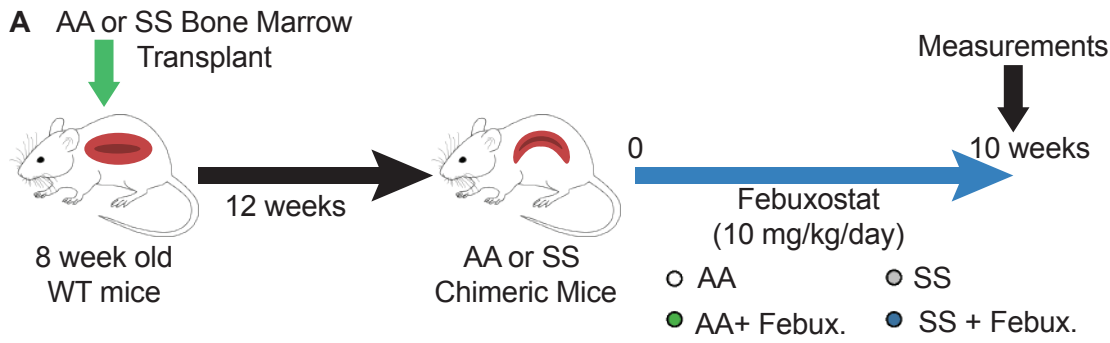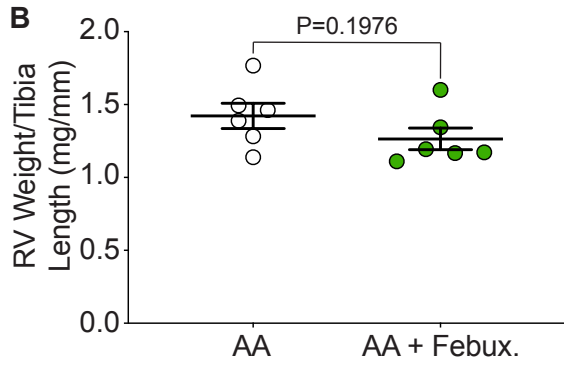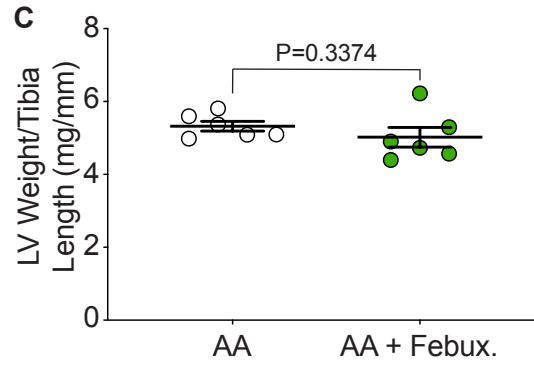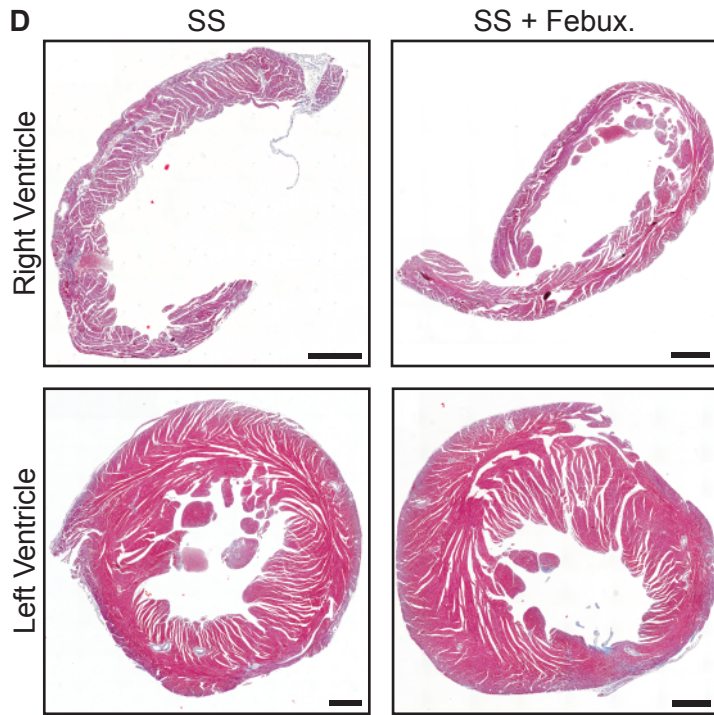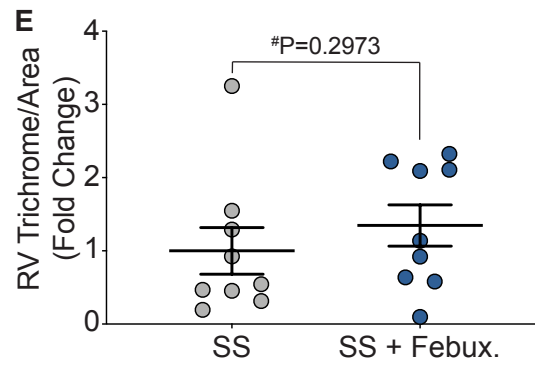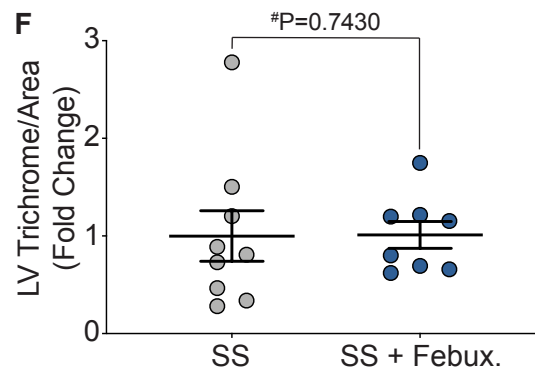

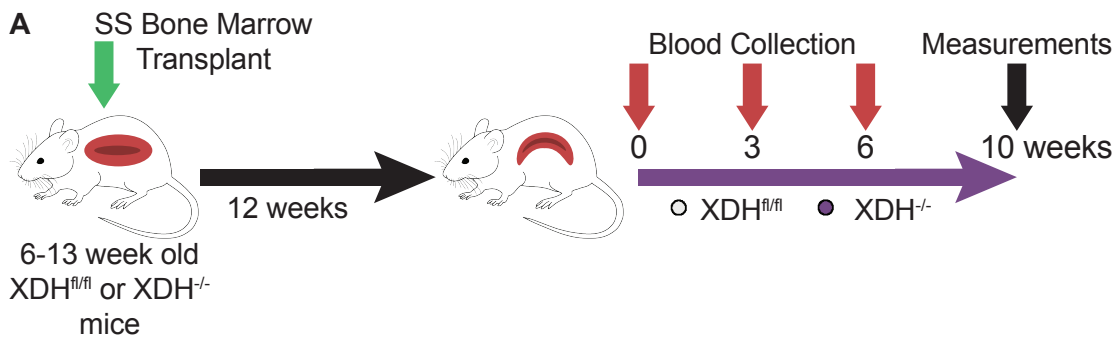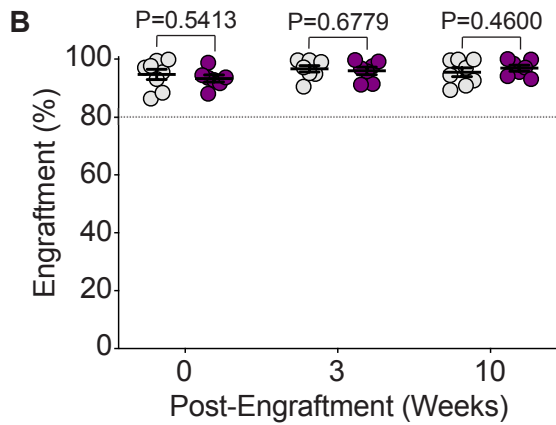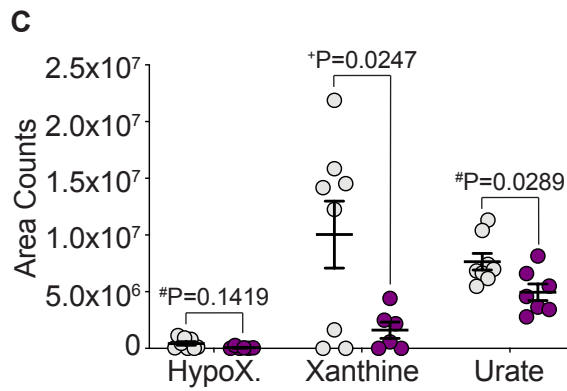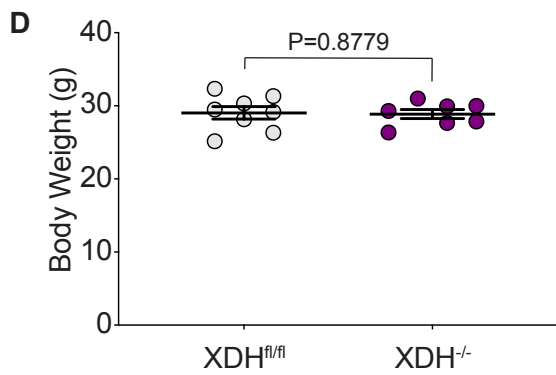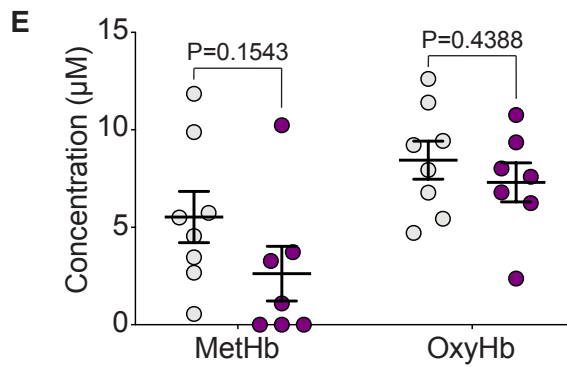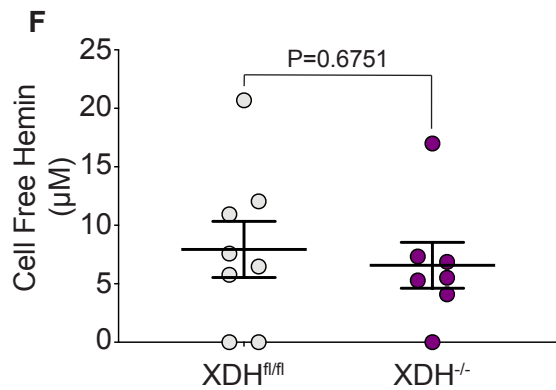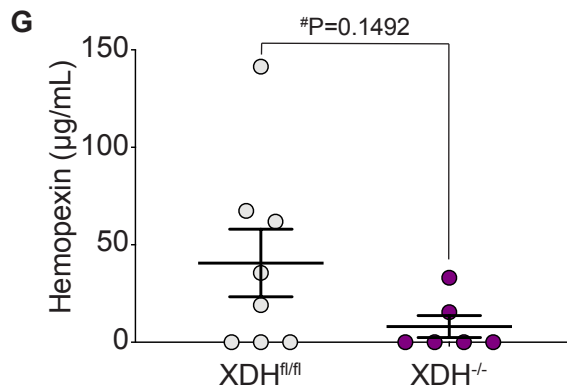

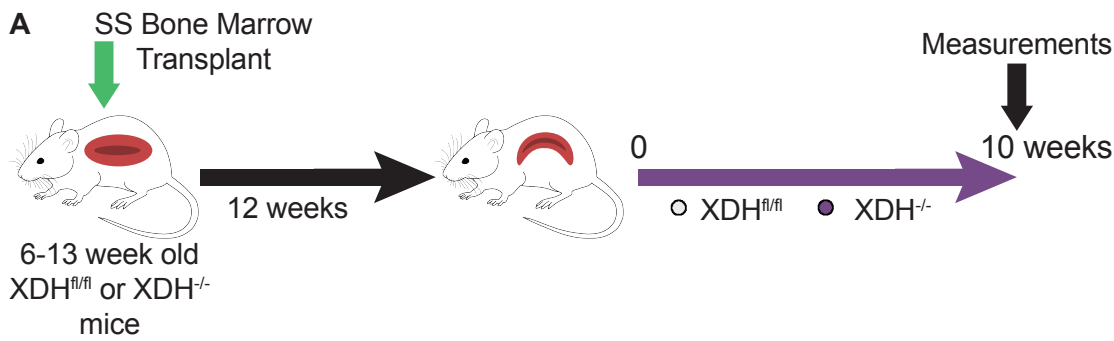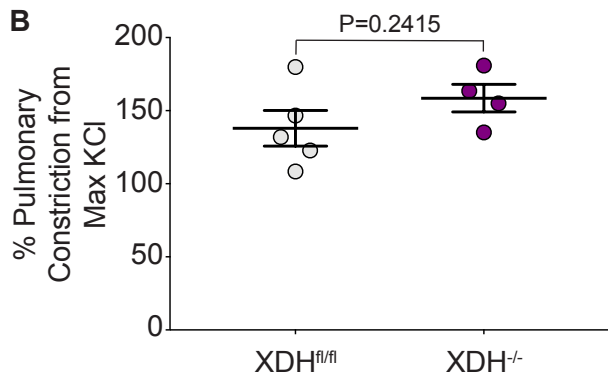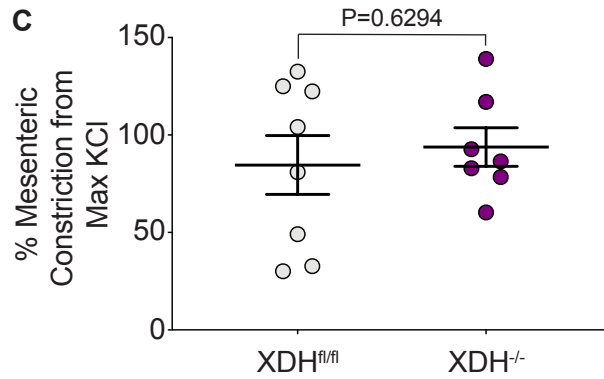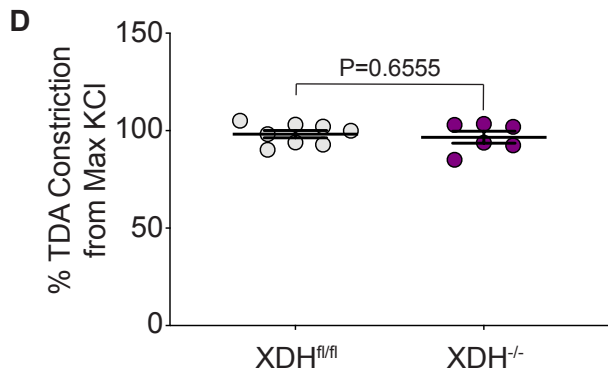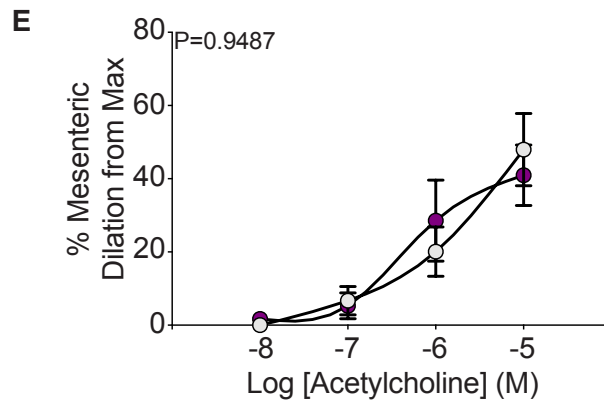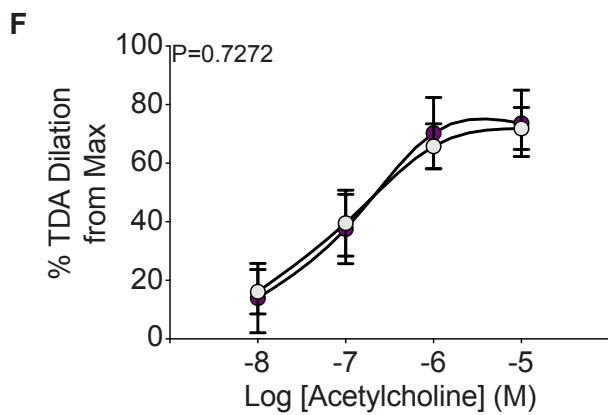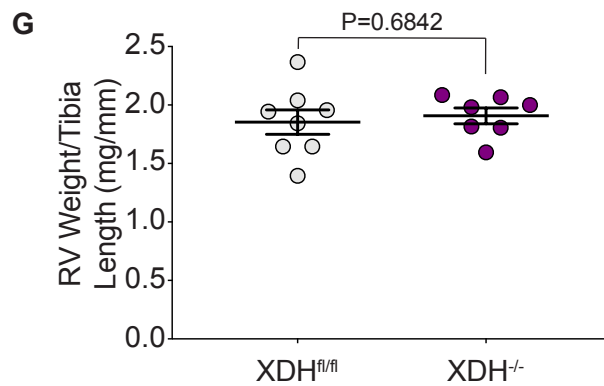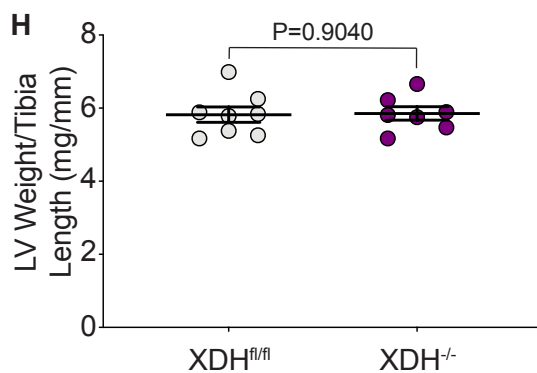

**Supplemental Table I.** Febuxostat treatment significantly decreased uric acid concentration and XO activity in plasma and tissues of AA control mice at 10 weeks post-initiation of treatment with effects on plasma detected as early as 3 weeks.

|        | 0 week                            |                        | 3 week           |                      | 10 week          |                      | Significance     |                                                                                          |
|--------|-----------------------------------|------------------------|------------------|----------------------|------------------|----------------------|------------------|------------------------------------------------------------------------------------------|
|        | AA<br>(n=6)                       | AA + Febux.<br>(n=5-6) | AA<br>(n=6)      | AA + Febux.<br>(n=6) | AA<br>(n=6)      | AA + Febux.<br>(n=6) |                  |                                                                                          |
| Plasma | Uric Acid, $\mu\text{M}$          | 0.62 $\pm$ 0.09        | 1.05 $\pm$ 0.07  | 1.52 $\pm$ 0.15      | 0.13 $\pm$ 0.05  | 0.95 $\pm$ 0.10      | 0.28 $\pm$ 0.06  | AA 0 vs AA + Febux. 0<br><b>AA 3 vs AA + Febux. 3</b><br><u>AA 10 vs. AA + Febux. 10</u> |
|        | XO Activity, $\mu\text{Units/mL}$ | 58.00 $\pm$ 8.81       | 64.34 $\pm$ 5.05 | 90.95 $\pm$ 8.92     | 13.05 $\pm$ 5.96 | 57.06 $\pm$ 6.13     | 16.67 $\pm$ 3.46 | P=0.011, <b>P&lt;0.001</b><br><u>P=0.001</u>                                             |
| Liver  | Uric Acid, $\mu\text{M}$          | -                      | -                | -                    | -                | 56.43 $\pm$ 3.87     | 9.97 $\pm$ 2.89  | <u>#P=0.002</u>                                                                          |
|        | XO Activity, mUnits/mg            | -                      | -                | -                    | -                | 15.86 $\pm$ 0.92     | 3.04 $\pm$ 0.93  | <u>P&lt;0.001</u>                                                                        |
| Lung   | Uric Acid, $\mu\text{M}$          | -                      | -                | -                    | -                | 13.78 $\pm$ 0.78     | 8.07 $\pm$ 1.69  | <u>P=0.012</u>                                                                           |
|        | XO Activity, mUnits/mg            | -                      | -                | -                    | -                | 28.62 $\pm$ 1.24     | 16.82 $\pm$ 3.46 | <u>#P=0004</u>                                                                           |
| Kidney | Uric Acid, $\mu\text{M}$          | -                      | -                | -                    | -                | 6.60 $\pm$ 0.32      | 0.44 $\pm$ 0.17  | <u>P&lt;0.001</u>                                                                        |
|        | XO Activity, mUnits/mg            | -                      | -                | -                    | -                | 2.13 $\pm$ 0.08      | 0.14 $\pm$ 0.05  | <u>P&lt;0.001</u>                                                                        |

Definition of abbreviations: XO = xanthine oxidase; febux = febuxostat; - = measurement not made. Values are mean  $\pm$  SEM using a 2-way ANOVA with Sidak's multiple comparison test for plasma measurements. Values are mean  $\pm$  SEM using an unpaired t test for tissue measurements unless otherwise noted. #Values are mean  $\pm$  SEM using a Mann-Whitney test. P values are in normal font for AA 0 week vs. AA + febuxostat 0 week, **bolded** for AA 3 week vs. AA + febuxostat 3 week, and underlined for AA 10 week vs. AA + febuxostat 10 week.

**Supplemental Table II.** Febuxostat treatment significantly decreased uric acid concentration and XO activity in plasma and tissues of SS sickle mice at 10 weeks post-initiation of treatment with effects on plasma detected as early as 3 weeks.

|        | 0 week                            |                       | 3 week            |                       | 10 week          |                       | Significance     |                                                  |
|--------|-----------------------------------|-----------------------|-------------------|-----------------------|------------------|-----------------------|------------------|--------------------------------------------------|
|        | SS<br>(n=12)                      | SS + Febux.<br>(n=12) | SS<br>(n=11-12)   | SS + Febux.<br>(n=11) | SS<br>(n=12)     | SS + Febux.<br>(n=12) |                  |                                                  |
| Plasma | Uric Acid, $\mu\text{M}$          | 1.32 $\pm$ 0.14       | 1.099 $\pm$ 0.29  | 0.55 $\pm$ 0.13       | 0.23 $\pm$ 0.07  | 2.65 $\pm$ 0.15       | 0.94 $\pm$ 0.13  | P=0.8814, <b>P=0.1189</b><br><u>P&lt;0.0001</u>  |
|        | XO Activity, $\mu\text{Units/mL}$ | 79.08 $\pm$ 8.52      | 65.95 $\pm$ 17.44 | 45.62 $\pm$ 9.72      | 13.56 $\pm$ 4.30 | 159.1 $\pm$ 8.78      | 52.20 $\pm$ 9.74 | P=0.8814, <b>P=0.0279</b><br><u>P=&lt;0.0001</u> |
| Liver  | Uric Acid, $\mu\text{M}$          | -                     | -                 | -                     | -                | 85.18 $\pm$ 2.04      | 2.97 $\pm$ 0.51  | <u>P&lt;0.0001</u>                               |
|        | XO Activity, mUnits/mg            | -                     | -                 | -                     | -                | 29.40 $\pm$ 1.00      | 0.97 $\pm$ 0.17  | <u>P&lt;0.0001</u>                               |
| Lung   | Uric Acid, $\mu\text{M}$          | -                     | -                 | -                     | -                | 11.50 $\pm$ 0.60      | 4.34 $\pm$ 0.54  | <u>P&lt;0.0001</u>                               |
|        | XO Activity, mUnits/mg            | -                     | -                 | -                     | -                | 12.60 $\pm$ 0.94      | 4.80 $\pm$ 0.62  | <u>+P&lt;0.0001</u>                              |
| Kidney | Uric Acid, $\mu\text{M}$          | -                     | -                 | -                     | -                | 10.88 $\pm$ 0.63      | 0.29 $\pm$ 0.06  | <u>#P&lt;0.0001</u>                              |
|        | XO Activity, mUnits/mg            | -                     | -                 | -                     | -                | 2.78 $\pm$ 0.20       | 0.08 $\pm$ 0.01  | <u>+P&lt;0.0001</u>                              |

Definition of abbreviations: XO = xanthine oxidase; febux = febuxostat; - = measurement not made. Values are mean  $\pm$  SEM using a 2-way ANOVA with Sidak's multiple comparison test for plasma measurements. Values are mean  $\pm$  SEM using an unpaired t test for tissue measurements unless otherwise noted. #Values are mean  $\pm$  SEM using a Mann-Whitney test. +Values are mean  $\pm$  SEM using an unpaired t test with Welch's correction. P values are in normal font for SS 0 week vs. febuxostat 0 week, **bolded** for SS 3 week vs. febuxostat 3 week, and underlined for SS 10 week vs. febuxostat 10 week.

**Supplemental Table III.** Blood cell indices for Townes AA bone marrow transplanted mice at 0, 3, 6, and 10 weeks of drinking normal water (AA) or febuxostat treated water (AA + Febux).

|                             | 0 week         |                        | 3 week         |                        | 6 week         |                      | 10 week        |                      | Significance<br>AA 0 vs AA + Febux. 0<br><b>AA 3 vs AA + Febux. 3</b><br>AA 6 vs AA + Febux. 6<br>AA 10 vs. AA + Febux. 10 |
|-----------------------------|----------------|------------------------|----------------|------------------------|----------------|----------------------|----------------|----------------------|----------------------------------------------------------------------------------------------------------------------------|
|                             | AA<br>(n=6)    | AA + Febux.<br>(n=5-6) | AA<br>(n=5-6)  | AA + Febux.<br>(n=4-6) | AA<br>(n=6)    | AA + Febux.<br>(n=5) | AA<br>(n=6)    | AA + Febux.<br>(n=6) |                                                                                                                            |
| WBC,<br>10 <sup>3</sup> /μL | 15.33 ± 0.69   | 14.28 ± 0.16           | 19.67 ± 0.72   | 15.53 ± 1.06           | 15.97 ± 0.65   | 12.26 ± 1.30         | 18.42 ± 1.40   | 16.57 ± 1.17         | P=0.918, <b>P=0.017</b><br>P=0.052, <u>P=0.551</u>                                                                         |
| RBC,<br>10 <sup>6</sup> /μL | 10.85 ± 0.26   | 10.88 ± 0.22           | 10.96 ± 0.08   | 11.03 ± 0.22           | 10.51 ± 0.17   | 11.07 ± 0.30         | 10.78 ± 0.20   | 11.15 ± 0.29         | P>0.999, <b>P=0.999</b><br>P=0.323, <u>P=0.674</u>                                                                         |
| HCT,<br>%                   | 35.00 ± 0.83   | 35.08 ± 0.62           | 34.88 ± 0.18   | 35.17 ± 0.64           | 33.38 ± 0.51   | 35.30 ± 0.79         | 34.13 ± 0.67   | 35.63 ± 1.07         | P>0.999, <b>P=0.997</b><br>P=0.254, <u>P=0.441</u>                                                                         |
| MCV,<br>fl                  | 32.35 ± 0.23   | 32.20 ± 0.09           | 31.83 ± 0.19   | 31.87 ± 0.10           | 31.78 ± 0.13   | 31.88 ± 0.16         | 31.65 ± 0.16   | 31.92 ± 0.20         | P=0.999, <b>P&gt;0.999</b><br>P=0.991, <u>P=0.694</u>                                                                      |
| RDW,<br>%                   | 27.35 ± 0.20   | 27.30 ± 0.10           | 27.20 ± 0.03   | 27.28 ± 0.08           | 27.27 ± 0.24   | 28.34 ± 0.41         | 27.27 ± 0.14   | 28.52 ± 0.32         | P>0.999, <b>P=0.998</b><br>P=0.006, <u>P=0.001</u>                                                                         |
| HGB,<br>g/dL                | 12.15 ± 0.25   | 12.37 ± 0.20           | 12.38 ± 0.05   | 12.30 ± 0.23           | 11.93 ± 0.13   | 12.62 ± 0.31         | 12.18 ± 0.22   | 12.67 ± 0.28         | P=0.927, <b>P=0.998</b><br>P=0.142, <u>P=0.400</u>                                                                         |
| MCH,<br>pg                  | 11.20 ± 0.10   | 11.40 ± 0.07           | 11.30 ± 0.05   | 11.13 ± 0.09           | 11.42 ± 0.10   | 11.42 ± 0.05         | 11.32 ± 0.05   | 11.35 ± 0.06         | P=0.221, <b>P=0.388</b><br>P>0.999, <u>P=0.996</u>                                                                         |
| PLT,<br>10 <sup>3</sup> /μL | 762.50 ± 19.80 | 743.83 ± 16.83         | 770.33 ± 17.72 | 689.67 ± 33.45         | 718.17 ± 39.24 | 810.00 ± 24.03       | 850.67 ± 16.95 | 924.33 ± 46.91       | P=0.985, <b>P=0.205</b><br>P=0.146, <u>P=0.282</u>                                                                         |
| MPV,<br>fl                  | 6.57 ± 0.03    | 6.60 ± 0.05            | 6.58 ± 0.08    | 6.60 ± 0.00            | 6.65 ± 0.07    | 6.72 ± 0.06          | 6.43 ± 0.06    | 6.55 ± 0.02          | P=0.986, <b>P=0.999</b><br>P=0.847, <u>P=0.414</u>                                                                         |
| Retic,<br>%                 | 5.93 ± 0.40    | 5.28 ± 0.12            | 3.98 ± 0.18    | 3.65 ± 0.22            | 4.95 ± 0.21    | 4.94 ± 0.30          | 4.88 ± 0.22    | 5.32 ± 0.27          | P=0.259, <b>P=0.821</b><br>P>0.999, <u>P=0.640</u>                                                                         |

Definition of abbreviations: febux = febuxostat; WBC = white blood cells; RBC = red blood cells; HCT = hematocrit; MCV = mean corpuscular volume; RDW = red blood cell distribution width; HGB = hemoglobin; MCH = mean corpuscular hemoglobin; PLT = platelets; MPV = mean platelet volume; retic = reticulocytes. Values are mean ± SEM using a 2 way ANOVA with Sidak's multiple comparison test. P values are in normal font for AA 0 week vs. AA + febuxostat 0 week, **bolded** for AA 3 week vs. AA + febuxostat 3 week, *italicized* for AA 6 week vs. AA + febuxostat 6 week, and underlined for AA 10 week vs. AA + febuxostat 10 week.



**Supplemental Table IV.** Blood cell indices for Townes SS bone marrow transplanted mice at 0, 3, 6, and 10 weeks of drinking normal water (SS) or febuxostat treated water (SS + Febux).

|                             | 0 week         |                       | 3 week          |                          | 6 week         |                       | 10 week         |                       | Significance<br>SS 0 vs SS + Febux. 0<br><b>SS 3 vs SS + Febux. 3</b><br>SS 6 vs SS + Febux. 6<br><u>SS 10 vs. SS + Febux. 10</u> |
|-----------------------------|----------------|-----------------------|-----------------|--------------------------|----------------|-----------------------|-----------------|-----------------------|-----------------------------------------------------------------------------------------------------------------------------------|
|                             | SS<br>(n=12)   | SS + Febux.<br>(n=12) | SS<br>(n=11-12) | SS + Febux.<br>(n=10-12) | SS<br>(n=12)   | SS + Febux.<br>(n=12) | SS<br>(n=11-12) | SS + Febux.<br>(n=12) |                                                                                                                                   |
| WBC,<br>10 <sup>3</sup> /μL | 16.74 ± 1.20   | 19.32 ± 1.35          | 23.72 ± 1.51    | 21.47 ± 0.94             | 26.14 ± 0.86   | 23.73 ± 1.11          | 26.60 ± 1.43    | 25.48 ± 1.09          | P=0.428, <b>P=0.622</b> ,<br><i>P=0.494</i> , <u>P=0.942</u>                                                                      |
| RBC,<br>10 <sup>6</sup> /μL | 6.09 ± 0.16    | 5.94 ± 0.14           | 6.52 ± 0.32     | 6.41 ± 0.08              | 6.17 ± 0.19    | 6.61 ± 0.11           | 6.42 ± 0.17     | 6.94 ± 0.14           | P=0.966, <b>P=0.986</b> ,<br><i>P=0.290</i> , <u>P=0.151</u>                                                                      |
| HCT,<br>%                   | 27.58 ± 0.83   | 26.67 ± 0.68          | 27.80 ± 0.79    | 28.53 ± 0.36             | 26.44 ± 0.73   | 28.28 ± 0.56          | 28.05 ± 0.35    | 30.64 ± 0.66          | P=0.776, <b>P=0.897</b> ,<br><i>P=0.165</i> , <u>P=0.024</u>                                                                      |
| MCV,<br>fl                  | 44.95 ± 0.33   | 44.73 ± 0.26          | 44.49 ± 0.35    | 44.51 ± 0.26             | 42.92 ± 0.32   | 42.75 ± 0.37          | 44.59 ± 0.42    | 44.13 ± 0.29          | P=0.983, <b>P&gt;0.999</b> ,<br><i>P=0.994</i> , <u>P=0.780</u>                                                                   |
| RDW,<br>%                   | 35.00 ± 0.40   | 35.01 ± 0.23          | 35.57 ± 0.19    | 36.41 ± 0.15             | 36.91 ± 0.26   | 36.81 ± 0.26          | 35.93 ± 0.39    | 36.93 ± 0.29          | P>0.999, <b>P=0.147</b> ,<br><i>P=0.999</i> , <u>P=0.057</u>                                                                      |
| HGB,<br>g/dL                | 9.72 ± 0.25    | 9.44 ± 0.23           | 9.82 ± 0.24     | 10.04 ± 0.17             | 9.63 ± 0.25    | 10.18 ± 0.19          | 9.77 ± 0.10     | 10.67 ± 0.23          | P=0.831, <b>P=0.910</b> ,<br><i>P=0.234</i> , <u>P=0.017</u>                                                                      |
| MCH,<br>pg                  | 15.97 ± 0.09   | 15.93 ± 0.09          | 15.76 ± 0.07    | 15.68 ± 0.11             | 15.63 ± 0.14   | 15.43 ± 0.10          | 15.55 ± 0.20    | 15.37 ± 0.08          | P=0.999, <b>P=0.983</b> ,<br><i>P=0.648</i> , <u>P=0.717</u>                                                                      |
| PLT,<br>10 <sup>3</sup> /μL | 421.00 ± 14.79 | 417.33 ± 12.69        | 445.50 ± 31.24  | 470.10 ± 7.94            | 535.58 ± 21.88 | 550.83 ± 18.12        | 513.50 ± 18.84  | 573.58 ± 19.45        | P=0.999, <b>P=0.866</b> ,<br><i>P=0.969</i> , <u>P=0.119</u>                                                                      |
| MPV,<br>fl                  | 6.37 ± 0.04    | 6.39 ± 0.04           | 6.43 ± 0.06     | 6.58 ± 0.04              | 6.48 ± 0.03    | 6.62 ± 0.05           | 6.47 ± 0.07     | 6.56 ± 0.05           | P=0.993, <b>P=0.130</b> ,<br><i>P=0.143</i> , <u>P=0.539</u>                                                                      |
| Retic,<br>%                 | 44.7 ± 0.99    | 44.74 ± 0.57          | -               | -                        | 44.30 ± 0.98   | 43.08 ± 0.81          | 46.58 ± 1.16    | 44.16 ± 1.22          | P=0.984,<br><i>P=0.764</i> , <u>P=0.234</u>                                                                                       |

Definition of abbreviations: febux = febuxostat; WBC = white blood cells; RBC = red blood cells; HCT = hematocrit; MCV = mean corpuscular volume; RDW = red blood cell distribution width; HGB = hemoglobin; MCH = mean corpuscular hemoglobin; PLT = platelets; MPV = mean platelet volume; retic = reticulocytes; - = measurement not made. Values are mean ± SEM using a 2 way ANOVA with Sidak's multiple comparison test. P values are in normal font for SS 0 week vs. SS + febuxostat 0 week, **bolded** for SS 3 week vs. SS + febuxostat 3 week, *italicized* for SS 6 week vs. SS + febuxostat 6 week, and underlined for SS 10 week vs. SS + febuxostat 10 week.

**Supplemental Table V.** Closed chest right heart catheterization indices for Townes AA, AA + febuxostat, SS, SS + febuxostat, *Xdh*<sup>fl/fl</sup>, and *HXdh*<sup>-/-</sup> chimeras ten weeks post-engraftment.

|                                   | AA<br>(n=6)       | AA + Febux.<br>(n=6) | SS<br>(n=9-10)    | SS + Febux.<br>(n=10) | XDH <sup>fl/fl</sup><br>(n=8) | XDH <sup>-/-</sup><br>(n=7) | Significance<br>AA vs AA + Febux<br><b>SS vs SS + Febux.</b><br>AA vs SS<br><u>AA + Febux. vs. SS + Febux.</u> | Significance<br>XDH <sup>fl/fl</sup> vs. XDH <sup>-/-</sup> |
|-----------------------------------|-------------------|----------------------|-------------------|-----------------------|-------------------------------|-----------------------------|----------------------------------------------------------------------------------------------------------------|-------------------------------------------------------------|
| RV Max Pressure<br>mmHg           | 28.21 ± 1.15      | 29.19 ± 1.40         | 30.29 ± 1.52      | 32.50 ± 0.79          | 32.53 ± 0.58                  | 33.65 ± 0.87                | P=0.983, <b>P=0.550</b> ,<br>P=0.720, <u>P=0.302</u>                                                           | P=0.294                                                     |
| Heart Rate<br>bpm                 | 581.38 ± 32.11    | 592.70 ± 21.25       | 620.69 ± 11.84    | 608.46 ± 12.03        | 610.11 ± 18.97                | 639.46 ± 11.39              | P=0.992, <b>P=0.972</b> ,<br>P=0.451, <u>P=0.958</u>                                                           | P=0.224                                                     |
| RV End Diastolic Pressure<br>mmHg | 3.07 ± 0.37       | 3.13 ± 0.20          | 2.28 ± 0.25       | 2.63 ± 0.17           | 2.39 ± 0.23                   | 2.95 ± 0.21                 | P>0.999, <b>P=0.720</b> ,<br>P=0.139, <u>P=0.532</u>                                                           | P=0.096                                                     |
| RV Max dP/dt                      | 1716.33 ± 163.67  | 1910.50 ± 181.50     | 2309.80 ± 138.69  | 2546.20 ± 102.23      | 2395.38 ± 100.78              | 2564 ± 117.02               | P=0.876, <b>P=0.583</b> ,<br>P=0.030, <u>P=0.018</u>                                                           | P=0.291                                                     |
| RV Min dP/dt                      | -1670.50 ± 141.90 | -1777.83 ± 156.67    | -1703.00 ± 138.30 | -1890.80 ± 79.29      | -1940.63 ± 86.39              | -2035.71 ± 112.33           | P=0.977, <b>P=0.689</b> ,<br>P>0.999, <u>P=0.958</u>                                                           | P=0.508                                                     |
| RV Contractile Index<br>1/s       | 60.33 ± 3.67      | 64.80 ± 3.01         | 75.99 ± 1.73      | 78.13 ± 1.40          | 73.53 ± 2.38                  | 75.98 ± 1.73                | P=0.651, <b>P=0.912</b> ,<br>P<0.001, <u>P=0.001</u>                                                           | P=0.431                                                     |
| PA Mean Pressure<br>mmHg          | 18.89 ± 0.74      | 19.52 ± 0.91         | 20.24 ± 0.99      | 21.67 ± 0.51          | 21.70 ± 0.38                  | 22.42 ± 0.56                | P=0.983, <b>P=0.550</b> ,<br>P=0.720, <u>P=0.302</u>                                                           | P=0.294                                                     |
| Tau (W)<br>ms                     | 5.45 ± 0.17       | 6.20 ± 0.40          | 5.79 ± 0.38       | 6.27 ± 0.86           | 6.13 ± 0.55                   | 5.82 ± 0.32                 | P=0.917, <b>P=0.960</b> ,<br>P=0.994, <u>P&gt;0.999</u>                                                        | P=0.650                                                     |

Definition of abbreviations: febux = febuxostat; RV = right ventricle; PA = pulmonary artery. Values are mean ± SEM using a 1 way ANOVA with Sidak's multiple comparison test for WT AA and SS mice. P values are in normal font for AA vs. AA + febuxostat, **bolded** for SS vs. SS + febuxostat, *italicized* for AA vs. SS, and underlined for AA + febuxostat vs. SS + febuxostat 10. Values are mean ± SEM using an unpaired t test for *Xdh* mice.

**Supplemental Table VI.** Right ventricle echocardiogram indices for Townes AA, AA + febuxostat, SS, SS + febuxostat, *Xdh fl/fl*, and *HXdh -/-* chimeras ten weeks post-engraftment.

|                  | AA<br>(n=5-6)   | AA + Febux.<br>(n=5-6) | Right Ventricle |                         | XDH <sup>fl/fl</sup><br>(n=5-8) | XDH <sup>-/-</sup><br>(n=3-7) | Significance                                                                                    | Significance                                |
|------------------|-----------------|------------------------|-----------------|-------------------------|---------------------------------|-------------------------------|-------------------------------------------------------------------------------------------------|---------------------------------------------|
|                  |                 |                        | SS<br>(n=8-11)  | SS + Febux.<br>(n=7-11) |                                 |                               | AA vs AA + Febux.<br><b>SS vs SS + Febux.</b><br>AA vs SS<br><u>AA + Febux. vs. SS + Febux.</u> | XDH <sup>fl/fl</sup> vs. XDH <sup>-/-</sup> |
| TV A<br>mm/s     | 334.05 ± 24.30  | 339.16 ± 14.01         | 327.43 ± 19.15  | 320.51 ± 28.81          | 325.22 ± 76.76                  | 362.41 ± 22.69                | P>0.999, <b>P=0.999</b> ,<br>P>0.999, <u>P=0.981</u>                                            | #P=0.656                                    |
| TV E<br>ms       | 192.97 ± 3.82   | 198.63 ± 25.32         | 439.54 ± 25.44  | 360.25 ± 32.00          | 330.07 ± 39.41                  | 375.28 ± 72.33                | P>0.999, <b>P=0.126</b> ,<br>P<0.001, <u>P=0.004</u>                                            | P=0.567                                     |
| TV LW A'<br>mm/s | -36.36 ± 4.03   | -32.82 ± 3.71          | -33.01 ± 3.19   | -40.73 ± 3.10           | -30.73 ± 5.66                   | -33.06 ± 2.77                 | P=0.949, <b>P=0.343</b> ,<br>P=0.940, <u>P=0.435</u>                                            | P=0.744                                     |
| TV LW E'<br>ms   | -28.17 ± 3.36   | -29.27 ± 2.57          | -28.84 ± 2.78   | -38.58 ± 3.23           | -25.15 ± 5.33                   | -27.65 ± 6.25                 | P=0.999, <b>P=0.088</b> ,<br>P>0.999, <u>P=0.186</u>                                            | P=0.768                                     |
| TV E/A<br>ms     | 0.55 ± 0.03     | 0.58 ± 0.06            | 1.40 ± 0.12     | 1.22 ± 0.16             | 1.24 ± 0.22                     | 1.02 ± 0.17                   | P>0.999, <b>P=0.711</b> ,<br>P=0.001, <u>P=0.020</u>                                            | P=0.469                                     |
| TV E/e'<br>mm/s  | -8.53 ± 0.96    | -7.02 ± 1.06           | -16.58 ± 2.98   | -7.85 ± 1.61            | -15.11 ± 2.79                   | -10.32 ± 1.85                 | P=0.988, <b>P=0.025</b> ,<br>P=0.073, <u>P=0.998</u>                                            | P=0.272                                     |
| PAT<br>mm/s      | 22.59 ± 0.78    | 20.51 ± 0.99           | 20.96 ± 0.80    | 20.73 ± 0.57            | 20.60 ± 1.59                    | 22.62 ± 1.33                  | P=0.405, <b>P=0.999</b> ,<br>P=0.516, <u>P&gt;0.999</u>                                         | P=0.349                                     |
| PET              | 58.98 ± 1.64    | 57.04 ± 1.04           | 63.23 ± 1.44    | 60.48 ± 2.23            | 66.88 ± 3.23                    | 70.67 ± 2.70                  | P=0.956, <b>P=0.675</b> ,<br>P=0.438, <u>P=0.634</u>                                            | P=0.385                                     |
| PA Peak Velocity | -529.39 ± 26.32 | -571.45 ± 29.89        | -599.00 ± 18.97 | -573.34 ± 24.52         | -458.73 ± 35.32                 | -470.89 ± 23.80               | P=0.782, <b>P=0.876</b> ,<br>P=0.234, <u>P&gt;0.999</u>                                         | P=0.780                                     |
| PAT/PET          | 0.39 ± 0.02     | 0.36 ± 0.01            | 0.33 ± 0.02     | 0.34 ± 0.01             | 0.31 ± 0.02                     | 0.32 ± 0.01                   | P=0.845, <b>P=0.962</b> ,<br>P=0.202, <u>P=0.984</u>                                            | P=0.601                                     |
| FAC<br>%         | 50.76 ± 2.80    | 43.99 ± 3.87           | 39.41 ± 1.31    | 46.85 ± 3.45            | 34.82 ± 0.67                    | 46.30 ± 4.25                  | P=0.546, <b>P=0.184</b> ,<br>P=0.053, <u>P=0.944</u>                                            | *P=0.036                                    |
| RVID<br>mm       | 1.38 ± 0.04     | 1.38 ± 0.15            | 1.68 ± 0.06     | 1.60 ± 0.10             | 1.80 ± 0.08                     | 1.88 ± 0.06                   | P>0.999, <b>P=0.931</b> ,<br>P=0.139, <u>P=0.385</u>                                            | P=0.4618                                    |
| RVFW<br>mm       | 0.40 ± 0.02     | 0.38 ± 0.01            | 0.40 ± 0.02     | 0.34 ± 0.01             | 0.39 ± 0.02                     | 0.43 ± 0.03                   | P=0.987, <b>P=0.115</b> ,<br>P=0.999, <u>P=0.622</u>                                            | P=0.305                                     |
| TAPSE<br>mm      | 1.15 ± 0.07     | 1.14 ± 0.09            | 1.24 ± 0.07     | 1.36 ± 0.09             | 1.07 ± 0.10                     | 1.22 ± 0.07                   | P>0.999, <b>P=0.737</b> ,<br>P=0.925, <u>P=0.320</u>                                            | P=0.266                                     |

Definition of abbreviations: febux = febuxostat; TV = tricuspid valve; A = peak velocity of late transmitral flow; E = peak velocity of early diastolic transmitral flow; LW = left wall; A' = peak velocity of diastolic mitral annular motion; E' = peak velocity of early diastolic mitral annular motion; PAT = pulmonary acceleration time; PET = pulmonary ejection time; PA = pulmonary artery; FAC = fractional area change; RVID = right ventricular internal diameter; RVFW = right ventricular free wall; TAPSE = tricuspid annular plane systolic excursion. Values are mean ± SEM using a 1 way ANOVA for WT AA and SS mice. P values are in normal font for AA vs. AA + febuxostat, **bolded** for SS vs. SS + febuxostat, *italicized* for AA vs. SS, and underlined for AA + febuxostat vs. SS + febuxostat 10. Values are mean ± SEM using an unpaired t test for XDH mice unless otherwise noted. #Values are mean ± SEM using a Mann-Whitney test.

**Supplemental Table VII.** Left ventricle echocardiogram indices for Townes AA, AA + febusostat, SS, SS + febusostat, *Xdh*<sup>fl/fl</sup>, and *HXdh*<sup>-/-</sup> chimeras ten weeks post-engraftment.

|                       | Left Ventricle |                      |                 |                         |                                 |                             | Significance                                               | Significance                                |
|-----------------------|----------------|----------------------|-----------------|-------------------------|---------------------------------|-----------------------------|------------------------------------------------------------|---------------------------------------------|
|                       | AA<br>(n=5-6)  | AA + Febus.<br>(n=6) | SS<br>(n=10-11) | SS + Febus.<br>(n=9-11) | XDH <sup>fl/fl</sup><br>(n=6-8) | XDH <sup>-/-</sup><br>(n=7) | AA vs AA + Febus.<br><b>SS vs SS + Febus.</b><br>AA vs SS  | XDH <sup>fl/fl</sup> vs. XDH <sup>-/-</sup> |
|                       |                |                      |                 |                         |                                 |                             | <u>AA + Febus. vs. SS + Febus.</u>                         |                                             |
| A'                    | -22.02 ± 2.16  | -21.48 ± 2.07        | -27.77 ± 2.34   | -23.76 ± 1.31           | -23.03 ± 2.08                   | -22.40 ± 2.32               | P>0.999, <b>P=0.437</b> ,<br>P=0.241, <u>P=0.916</u>       | P=0.843                                     |
| AET                   | 56.53 ± 0.92   | 55.28 ± 1.37         | 57.83 ± 1.61    | 55.40 ± 1.55            | 56.01 ± 2.21                    | 56.56 ± 3.59                | P=0.983, <b>P=0.637</b> ,<br>P=0.969, <u>P&gt;0.999</u>    | P=0.894                                     |
| E'                    | -29.30 ± 2.43  | -32.22 ± 2.41        | -32.06 ± 1.64   | -33.60 ± 2.25           | -30.41 ± 2.07                   | -28.84 ± 3.56               | P=0.887, <b>P=0.967</b> ,<br>P=0.857, <u>P=0.988</u>       | P=0.710                                     |
| IVCT                  | 14.77 ± 0.88   | 15.97 ± 0.88         | 13.16 ± 0.88    | 12.31 ± 0.70            | 13.78 ± 2.10                    | 12.91 ± 1.52                | P=0.876, <b>P=0.894</b> ,<br>P=0.610, <u>P=0.027</u>       | P=0.748                                     |
| IVRT                  | 15.51 ± 1.11   | 15.51 ± 1.74         | 15.13 ± 0.62    | 15.68 ± 1.86            | 17.55 ± 0.13                    | 15.03 ± 1.53                | P>0.999, <b>P=0.997</b> ,<br>P>0.999, <u>P&gt;0.999</u>    | +P=0.151                                    |
| MV A                  | 463.06 ± 58.69 | 378.48 ± 28.71       | 451.34 ± 17.25  | 437.95 ± 31.43          | 398.37 ± 40.40                  | 457.05 ± 58.75              | P=0.414, <b>P=0.996</b> ,<br>P=0.997, <u>P=0.638</u>       | P=0.416                                     |
| MV E                  | 721.20 ± 38.57 | 723.46 ± 58.07       | 760.50 ± 24.40  | 777.47 ± 39.33          | 598.22 ± 46.68                  | 694.53 ± 39.95              | P>0.999, <b>P=0.994</b> ,<br>P=0.936, <u>P=0.825</u>       | P=0.147                                     |
| LV MPI IV             | 0.54 ± 0.03    | 0.57 ± 0.04          | 0.49 ± 0.02     | 0.47 ± 0.03             | 0.58 ± 0.06                     | 0.49 ± 0.04                 | P=0.926, <b>P=0.971</b> ,<br>P=0.762, <u>P=0.110</u>       | P=0.222                                     |
| MV E/A                | 1.66 ± 0.17    | 1.94 ± 0.16          | 1.71 ± 0.07     | 1.67 ± 0.09             | 1.61 ± 0.21                     | 1.65 ± 0.20                 | P=0.458, <b>P=0.999</b> ,<br>P=0.998, <u>P=0.393</u>       | P=0.899                                     |
| MV E/E'               | -25.03 ± 1.41  | -23.00 ± 2.41        | -24.27 ± 1.25   | -23.65 ± 1.68           | -21.69 ± 1.96                   | -25.35 ± 1.88               | P=0.920, <b>P=0.997</b> ,<br>P=0.996, <u>P=0.998</u>       | P=0.203                                     |
| Heart Rate            | 490.02 ± 15.76 | 472.49 ± 22.76       | 459.62 ± 10.51  | 465.10 ± 10.83          | 441.43 ± 16.43                  | 447.17 ± 11.10              | P=0.911, <b>P=0.996</b> ,<br>P=0.465, <u>P=0.994</u>       | P=0.7831                                    |
| Diameter;s            | 2.78 ± 0.09    | 2.64 ± 0.14          | 2.75 ± 0.12     | 2.61 ± 0.09             | 2.75 ± 0.18                     | 2.92 ± 0.17                 | P=0.911, <b>P=0.782</b> ,<br>P>0.999, <u>P&gt;0.999</u>    | P=0.519                                     |
| Diameter;d            | 3.90 ± 0.11    | 3.77 ± 0.14          | 4.14 ± 0.11     | 4.06 ± 0.10             | 4.05 ± 0.17                     | 4.11 ± 0.14                 | P=0.937, <b>P=0.963</b> ,<br>P=0.507, <u>P=0.332</u>       | P=0.765                                     |
| Volume;s              | 29.35 ± 2.51   | 26.17 ± 3.27         | 29.24 ± 2.93    | 25.34 ± 2.03            | 29.69 ± 4.79                    | 33.82 ± 5.13                | P=0.934, <b>P=0.700</b> ,<br>P>0.999, <u>P=0.999</u>       | P=0.566                                     |
| Volume;d              | 66.34 ± 4.60   | 61.48 ± 5.58         | 76.66 ± 4.56    | 73.03 ± 4.00            | 73.28 ± 7.28                    | 75.75 ± 6.34                | P=0.956, <b>P=0.955</b> ,<br>P=0.473, <u>P=0.363</u>       | P=0.804                                     |
| Stroke Volume         | 36.99 ± 2.38   | 35.32 ± 2.79         | 47.41 ± 3.15    | 47.69 ± 3.29            | 43.59 ± 3.30                    | 41.93 ± 3.42                | P=0.997, <b>P&gt;0.999</b> ,<br>P=0.144, <u>P=0.059</u>    | P=0.733                                     |
| Ejection Fraction     | 55.87 ± 1.29   | 58.06 ± 2.30         | 62.28 ± 2.64    | 65.17 ± 2.43            | 60.90 ± 3.03                    | 56.09 ± 3.83                | P=0.977, <b>P=0.837</b> ,<br>P=0.334, <u>P=0.241</u>       | P=0.337                                     |
| Fractional Shortening | 28.70 ± 0.85   | 30.20 ± 1.50         | 33.64 ± 1.97    | 35.62 ± 1.75            | 32.49 ± 2.13                    | 29.30 ± 2.64                | P=0.981, <b>P=0.861</b> ,<br>P=0.276, <u>P=0.200</u>       | P=0.359                                     |
| Cardiac Output        | 18.08 ± 1.13   | 16.44 ± 0.75         | 20.50 ± 0.83    | 22.06 ± 1.43            | 19.09 ± 1.32                    | 18.81 ± 1.73                | P=0.881, <b>P=0.772</b> ,<br>P=0.553, <u>P=0.012</u>       | P=0.900                                     |
| LV Mass               | 116.73 ± 1.33  | 115.37 ± 7.12        | 143.48 ± 5.52   | 159.86 ± 9.27           | 130.30 ± 10.74                  | 136.08 ± 12.10              | P>0.999, <b>P=0.350</b> ,<br>P=0.136, <u>P=0.002</u>       | P=0.726                                     |
| LV Mass Cor           | 93.38 ± 1.06   | 92.30 ± 5.69         | 114.78 ± 4.42   | 127.89 ± 7.42           | 104.24 ± 8.59                   | 108.86 ± 9.68               | P>0.999, <b>P=0.350</b> ,<br>P=0.136, <u>P=0.002</u>       | P=0.726                                     |
| LVAW;s                | 1.15 ± 0.05    | 1.14 ± 0.05          | 1.28 ± 0.03     | 1.39 ± 0.03             | 1.15 ± 0.04                     | 1.10 ± 0.05                 | P=0.999, <b>P=0.104</b> ,<br>P=0.093, <u>P&lt;0.001</u>    | P=0.459                                     |
| LVAW;d                | 0.89 ± 0.02    | 0.85 ± 0.04          | 0.97 ± 0.04     | 1.07 ± 0.04             | 0.89 ± 0.03                     | 0.89 ± 0.04                 | P=0.947, <b>P=0.281</b> ,<br>P=0.568, <u>P=0.004</u>       | P=0.933                                     |
| LVPW;s                | 1.10 ± 0.02    | 1.12 ± 0.04          | 1.29 ± 0.07     | 1.30 ± 0.05             | 1.18 ± 0.09                     | 1.16 ± 0.06                 | P=0.997, <b>P&gt;0.999</b> ,<br>P=0.089, <u>P=0.143</u>    | P=0.887                                     |
| LVPW;d                | 0.80 ± 0.03    | 0.84 ± 0.02          | 0.86 ± 0.05     | 0.89 ± 0.04             | 0.80 ± 0.05                     | 0.81 ± 0.03                 | P=0.963, <b>P=0.985</b> ,<br>P=0.779, <u>P=0.917</u>       | #P=0.463                                    |
| Left Atrial Area      | 4.04 ± 0.27    | 4.08 ± 0.31          | 4.07 ± 0.21     | 4.09 ± 0.17             | 4.07 ± 0.36                     | 3.84 ± 0.27                 | P>0.999, <b>P&gt;0.999</b> ,<br>P>0.999, <u>P&gt;0.999</u> | P=0.620                                     |

Definition of abbreviations: A' = peak velocity of diastolic mitral annular motion; AET = aortic ejection time; E' = peak velocity of early diastolic mitral annular motion; IVCT = isovolumic contraction time; IVRT = isovolumic relaxation time; MV = mitral valve; A = peak velocity of late transmitral flow; E = peak velocity of early diastolic transmitral flow; LV = left ventricle; MPI = myocardial performance index; s = systolic; d = diastolic; LVAW = left ventricle anterior wall; LVPW = left ventricle posterior wall. Values are mean ± SEM using a one way ANOVA for WT AA and SS mice. P values are in normal font for AA vs. AA + febusostat, **bolded** for SS vs. SS + febusostat, *italicized* for AA vs. SS, and underlined for AA + febusostat vs. SS + febusostat. Values are mean ± SEM using a students t test for *Xdh* mice unless otherwise noted. +Values are mean ± SEM using an unpaired t test with Welch's correction. #Values are mean ± SEM using a Mann-Whitney test.

**Supplemental Table VIII.** Hepatocyte-specific XO knockout significantly decreased uric acid concentration and XO activity in plasma and liver tissue of *HXdh*<sup>-/-</sup> mice at 10 weeks post-engraftment with effects on plasma detected as early as 3 weeks.

|        | 0 week                               |                                      | 3 week                               |                                      | 10 week                                |                                      | Significance      |                                           |
|--------|--------------------------------------|--------------------------------------|--------------------------------------|--------------------------------------|----------------------------------------|--------------------------------------|-------------------|-------------------------------------------|
|        | <i>XDH</i> <sup>fl/fl</sup><br>(n=8) | <i>XDH</i> <sup>-/-</sup><br>(n=6-7) | <i>XDH</i> <sup>fl/fl</sup><br>(n=8) | <i>XDH</i> <sup>-/-</sup><br>(n=6-7) | <i>XDH</i> <sup>fl/fl</sup><br>(n=7-8) | <i>XDH</i> <sup>-/-</sup><br>(n=6-7) |                   |                                           |
| Plasma | Uric Acid, $\mu\text{M}$             | 1.52 $\pm$ 0.16                      | 1.16 $\pm$ 0.10                      | 1.88 $\pm$ 0.16                      | 1.05 $\pm$ 0.09                        | 1.00 $\pm$ 0.14                      | 0.31 $\pm$ 0.05   | P=0.231, <b>P=0.003</b><br><u>P=0.005</u> |
|        | XO Activity, $\mu\text{Units/mL}$    | 91.21 $\pm$ 9.70                     | 72.82 $\pm$ 6.07                     | 112.83 $\pm$ 9.49                    | 68.26 $\pm$ 2.01                       | 229.40 $\pm$ 33.13                   | 70.74 $\pm$ 12.27 | P=0.355, <b>P=0.006</b><br><u>P=0.005</u> |
| Liver  | Uric Acid, $\mu\text{M}$             | -                                    | -                                    | -                                    | -                                      | 93.44 $\pm$ 1.44                     | 14.84 $\pm$ 1.11  | <u>P&lt;0.001</u>                         |
|        | XO Activity, mUnits/mg               | -                                    | -                                    | -                                    | -                                      | 24.56 $\pm$ 1.47                     | 4.13 $\pm$ 0.43   | <b>#P&lt;0.001</b>                        |
| Lung   | Uric Acid, $\mu\text{M}$             | -                                    | -                                    | -                                    | -                                      | 20.46 $\pm$ 2.78                     | 20.70 $\pm$ 1.76  | <u>P=0.946</u>                            |
|        | XO Activity, mUnits/mg               | -                                    | -                                    | -                                    | -                                      | 12.67 $\pm$ 1.88                     | 13.92 $\pm$ 0.87  | <u>P=0.575</u>                            |
| Kidney | Uric Acid, $\mu\text{M}$             | -                                    | -                                    | -                                    | -                                      | 15.31 $\pm$ 0.79                     | 12.29 $\pm$ 2.54  | <u>+P=0.294</u>                           |
|        | XO Activity, mUnits/mg               | -                                    | -                                    | -                                    | -                                      | 4.87 $\pm$ 0.22                      | 3.82 $\pm$ 0.78   | <u>+P=0.236</u>                           |

Definition of abbreviations: XO = xanthine oxidase; - = measurement not made. Values are mean  $\pm$  SEM using a two-way ANOVA with Sidak's multiple comparison test for plasma measurements. Values are mean  $\pm$  SEM using an unpaired t-test unless otherwise noted. #Values are mean  $\pm$  SEM using a Mann-Whitney test. +Values are mean  $\pm$  SEM using an unpaired t test with Welch's correction. P values are in normal font for *Xdh* fl/fl 0 week vs. *HXdh*<sup>-/-</sup> 0 week, **bolded** for *Xdh* fl/fl 3 week vs. *HXdh*<sup>-/-</sup> 3 week, and underlined for *Xdh* fl/fl 10 week vs. *HXdh*<sup>-/-</sup> 10 week.

**Supplemental Table IX.** Blood cell indices for Townes SS bone marrow transplanted *Xdh fl/fl* and *HXdh -/-* chimeras at weeks 0, 3, 6, and 10 weeks post-engraftment.

|                             | 0 week                  |                       | 3 week                    |                       | 6 week                  |                       | 10 week                 |                       | Significance<br>SS + XDH fl/fl 0 vs SS + XDH -/- 0<br><b>SS + XDH fl/fl 3 vs SS + XDH -/- 3</b><br>SS + XDH fl/fl 6 vs SS + XDH -/- 6<br>SS + XDH fl/fl 10 vs. SS + XDH -/- 10 |
|-----------------------------|-------------------------|-----------------------|---------------------------|-----------------------|-------------------------|-----------------------|-------------------------|-----------------------|--------------------------------------------------------------------------------------------------------------------------------------------------------------------------------|
|                             | SS + XDH fl/fl<br>(n=8) | SS + XDH -/-<br>(n=7) | SS + XDH fl/fl<br>(n=7-8) | SS + XDH -/-<br>(n=7) | SS + XDH fl/fl<br>(n=8) | SS + XDH -/-<br>(n=7) | SS + XDH fl/fl<br>(n=8) | SS + XDH -/-<br>(n=7) |                                                                                                                                                                                |
| WBC,<br>10 <sup>3</sup> /μL | 16.03 ± 1.19            | 20.44 ± 0.98          | 20.13 ± 1.05              | 22.04 ± 1.34          | 22.74 ± 1.57            | 25.17 ± 1.23          | 27.16 ± 0.54            | 30.76 ± 2.30          | P=0.095, <b>P=0.805</b><br><i>P=0.605, P=0.263</i>                                                                                                                             |
| RBC,<br>10 <sup>6</sup> /μL | 6.27 ± 0.15             | 6.23 ± 0.11           | 5.79 ± 0.08               | 6.04 ± 0.15           | 5.55 ± 0.16             | 6.03 ± 0.17           | 5.90 ± 0.22             | 5.73 ± 0.12           | P>0.999, <b>P=0.681</b><br><i>P=0.105, P=0.898</i>                                                                                                                             |
| HCT,<br>%                   | 30.54 ± 0.58            | 30.34 ± 0.61          | 27.25 ± 0.31              | 28.47 ± 0.92          | 26.19 ± 0.79            | 28.21 ± 0.81          | 27.14 ± 0.98            | 26.26 ± 0.69          | P>0.999, <b>P=0.680</b><br><i>P=0.212, P=0.873</i>                                                                                                                             |
| MCV,<br>fl                  | 48.75 ± 0.44            | 48.73 ± 0.41          | 47.09 ± 0.46              | 47.09 ± 0.57          | 47.23 ± 0.47            | 46.73 ± 0.39          | 45.99 ± 0.47            | 45.80 ± 0.45          | P>0.999, <b>P&gt;0.999</b><br><i>P=0.909, P=0.997</i>                                                                                                                          |
| RDW,<br>%                   | 34.23 ± 0.42            | 34.01 ± 0.36          | 36.39 ± 0.58              | 37.01 ± 1.08          | 36.35 ± 0.42            | 36.56 ± 0.46          | 36.81 ± 0.62            | 36.89 ± 0.46          | P=0.998, <b>P=0.908</b><br><i>P=0.999, P&gt;0.999</i>                                                                                                                          |
| HGB,<br>g/dL                | 10.54 ± 0.19            | 10.56 ± 0.16          | 9.74 ± 0.11               | 10.13 ± 0.24          | 9.275 ± 0.24            | 9.96 ± 0.26           | 9.56 ± 0.27             | 9.47 ± 0.20           | P>0.999, <b>P=0.602</b><br><i>P=0.114, P=0.997</i>                                                                                                                             |
| MCH,<br>pg                  | 16.86 ± 0.19            | 16.94 ± 0.16          | 16.84 ± 0.19              | 16.79 ± 0.17          | 16.75 ± 0.15            | 16.54 ± 0.17          | 16.26 ± 0.20            | 16.56 ± 0.13          | P=0.996, <b>P=0.999</b><br><i>P=0.872, P=0.657</i>                                                                                                                             |
| PLT,<br>10 <sup>3</sup> /μL | 464.00 ± 18.74          | 425.71 ± 8.25         | 476.63 ± 19.25            | 511.14 ± 34.93        | 444.75 ± 24.52          | 515.00 ± 16.41        | 489.00 ± 30.01          | 511.57 ± 25.23        | P=0.695, <b>P=0.769</b><br><i>P=0.152, P=0.939</i>                                                                                                                             |
| MPV,<br>fl                  | 6.25 ± 0.04             | 6.24 ± 0.04           | 6.33 ± 0.06               | 6.34 ± 0.05           | 6.38 ± 0.07             | 6.33 ± 0.03           | 6.41 ± 0.07             | 6.34 ± 0.05           | P>0.999, <b>P=0.999</b><br><i>P=0.957, P=0.837</i>                                                                                                                             |
| Retic,<br>%                 | 47.75 ± 1.15            | 47.83 ± 0.69          | 49.50 ± 1.10              | 47.90 ± 1.43          | 43.89 ± 0.82            | 42.33 ± 1.21          | 47.50 ± 1.19            | 47.60 ± 0.49          | P>0.999, <b>P=0.747</b><br><i>P=0.764, P&gt;0.999</i>                                                                                                                          |

Definition of abbreviations: WBC = white blood cells; RBC = red blood cells; HCT = hematocrit; MCV = mean corpuscular volume; RDW = red blood cell distribution width; HGB = hemoglobin; MCH = mean corpuscular hemoglobin; PLT = platelets; MPV = mean platelet volume; Retic = reticulocyte. Values are mean ± SEM using a two-way ANOVA with Sidak's multiple comparison test. P values are in normal font for SS *Xdh fl/fl* 0 week vs. SS + *HXdh -/-* 0 week, **bolded** for SS + *Xdh fl/fl* 3 week vs. SS + *HXdh -/-* 3 week, *italicized* for SS + *Xdh fl/fl* 6 week vs. SS + *HXdh -/-* 6 week, and underlined for SS + *Xdh fl/fl* 10 week vs. SS + *HXdh -/-* 10 week.
